# Supplementary material for: Investigation of FoxO3 dynamics during erythroblast development in β-thalassemia major
Source: PubMed Central journal article supplement (PMC5669432; doi:10.1371/journal.pone.0187610), 2017-11-03
Supplement: pone.0187610.s001.pdf [file pone.0187610.s001.pdf]

### Primer sets for real-time RT-PCR analysis

| <b>Gene</b>  | <b>Forward sequence</b> | <b>Reverse sequence</b>     | <b>Amplicon (bp)</b> | <b>Accession number</b> |
|--------------|-------------------------|-----------------------------|----------------------|-------------------------|
| <i>BIM</i>   | TGGCAAAGCAACCTTCTGATG   | GCAGGCTGCAATTGTCTACCT       | 64                   | NM_001204113            |
| <i>CAT</i>   | GAACTGTCCCTACCGTGCTCGA  | CCAGAATATTGGATGCTGTGCTCCAGG | 156                  | NM_001752               |
| <i>GAPDH</i> | GAAGGCTGGGGCTCATTT      | CAGGAGGCATTGCTGATGAT        | 138                  | NM_001289746            |
| <i>PINK1</i> | TACCAGTGCACCAGGAGAAG    | GCTTGGGACCTCTCTTGGAT        | 209                  | NM_032409               |
| <i>RIOK3</i> | TGTGGCATGCTGGAAAGGTCTG  | GCTTCCTTGACTCCTCCTTTCTGG    | 136                  | NM_003831               |
| <i>SOD2</i>  | ACCTCAGCCCTAACGGTGGT    | CAGCCGTCAGCTTCTCCTAAA       | 102                  | NM_001322820            |
| <i>ULK1</i>  | TCGAGTTCTCCCGCAAGG      | CGTCTGAGACTTGCGAGGT         | 134                  | NM_003565               |
